# Supplementary material for: Catalytic n-pentane conversion on H-ZSM-5 at high pressure
Source: Royal Society of Chemistry journal article supplement (doi:10.1039/c5nj02733k), 2016-01-01
Supplement: c5nj02733k1.pdf [file c5nj02733k1.pdf]

# Catalytic *n*-pentane Conversion on H-ZSM-5 at High Pressure

## Supporting Information

Edward P. Schreiner, Shewangizaw Teketel, Raul F. Lobo\*

Center for Catalytic Science and Technology  
Department of Chemical and Biomolecular Engineering,  
University of Delaware, Newark, DE, 19716, USA

\*Corresponding Author

Email: [lobo@udel.edu](mailto:lobo@udel.edu)

Fax: 302-831-1048

Tel: 302-831-1261

### Key Words

Alkane cracking

Endothermic Cooling

Reaction Mechanism

Bronsted Acid Catalysis

Supercritical Fluids

Supporting Information

**Table 1:** Product carbon selectivity at 15 min time on stream from high pressure conversion of *n*-pentane on H-[Al]ZSM-5. Reaction conditions: T = 633 – 723 K, P = 40 bar, and WHSV = 1120 g<sub>C5</sub>g<sub>cat</sub><sup>-1</sup>h<sup>-1</sup>.

| Pressure               | 40 bar |       |       |
|------------------------|--------|-------|-------|
| Temperature            | 633 K  | 673 K | 723 K |
| Conversion             | 4.29   | 12.20 | 29.57 |
| methane                | 0.05   | 0.05  | 0.13  |
| ethane                 | 0.28   | 0.36  | 0.86  |
| ethene                 | 0.21   | 0.30  | 0.45  |
| propane                | 23.47  | 29.18 | 35.67 |
| propene                | 1.21   | 1.38  | 1.71  |
| <i>iso</i> -butane     | 15.87  | 15.55 | 14.25 |
| <i>n</i> -butane       | 26.04  | 27.90 | 26.25 |
| <i>trans</i> -2-butene | 0.65   | 0.69  | 0.71  |
| 1-butene               | 0.33   | 0.38  | 0.45  |
| <i>iso</i> -butene     | 1.72   | 1.57  | 1.46  |
| <i>cis</i> -2-butene   | 1.38   | 0.93  | 0.77  |
| pentenes               | 5.22   | 3.97  | 3.19  |
| hexanes                | 5.97   | 10.93 | 7.10  |
| hexenes                | 11.70  | 1.97  | 1.72  |
| heptanes               | 2.24   | 1.67  | 1.17  |
| heptenes               | 3.71   | 2.75  | 2.06  |
| Other                  | 0.00   | 0.39  | 2.05  |
| P/O Ratio              | 2.83   | 6.14  | 6.83  |
